# Supplementary material for: A flexible capacitive pressure sensor with a hybrid porous PDMS/SA hydrogel structure for touch/pain detection
Source: Royal Society of Chemistry journal article supplement (doi:10.1039/d4nr01874e), 2024-01-01
Supplement: d4nr01874e4.pdf [file d4nr01874e4.pdf]

## Supplementary Information

# Flexible capacitive pressure sensor with hybrid porous PDMS/SA hydrogel structure for touch/pain detection

Haizhou Huang<sup>a, ‡</sup>, Xu Ran<sup>c, ‡</sup>, Shu Wan<sup>b, \*</sup>, Yi Wang<sup>a</sup>, Hengchang Bi<sup>c, \*</sup>

Dr. H. Huang, Mr. Y. Wang

<sup>a</sup> Key Laboratory of Opto-Electronic Science and Technology for Medicine of Ministry of Education, Fujian Provincial Key Laboratory of Photonics Technology, College of Photonic and Electronic Engineering, Fujian Normal University, Fuzhou 350117, China

Dr. S. Wan

<sup>b</sup> Key Laboratory of Optoelectronic Technology and Systems, Ministry of Education, Key Disciplines Laboratory of Novel Micro-Nano Devices and System Technology, School of Optoelectronics Engineering, Chongqing University, Chongqing, 400044, China

Mr. Xu Ran, Prof. H. Bi

<sup>c</sup> The Shanghai Key Laboratory of Multidimensional Information Processing, School of Communication and Electronic Engineering, East China Normal University, 500 Dongchuan Road, Shanghai, 200241, China

E-mail: wanshu@cqu.edu.cn; hcbi@cee.ecnu.edu.cn

**KEYWORDS:** Capacitive pressure sensor, Pain detection, Touch sensing, Nociceptors, Electron double layers

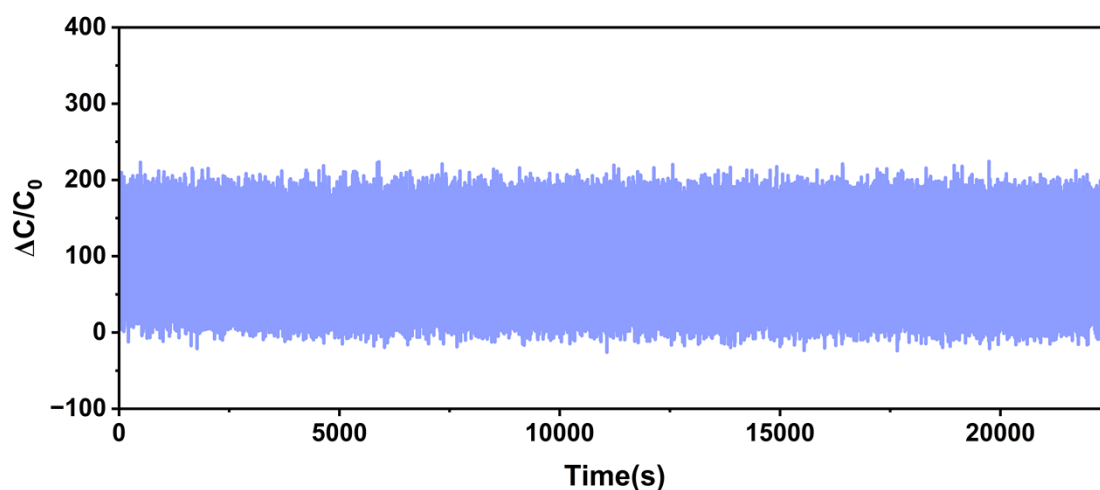

Fig. S1. 3000 repetitive response and recovery curves under 50 kPa.

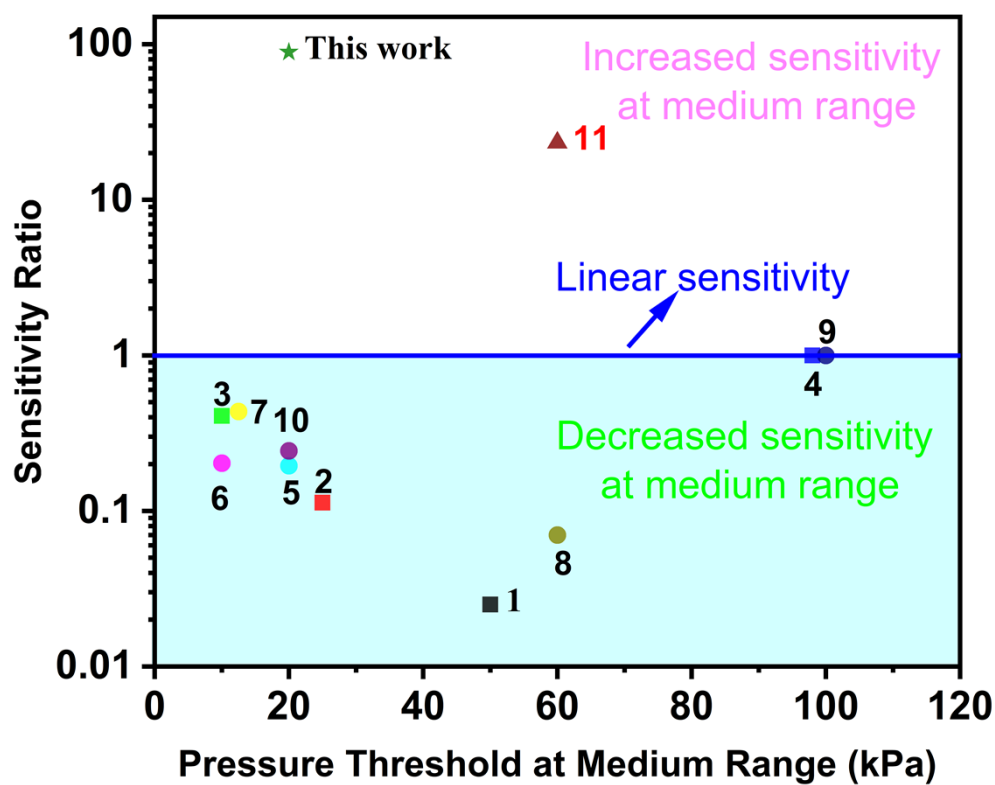

Fig. S2. Sensitivity ratio (sensitivity in the medium pressure range and low pressure range) and pressure threshold at the medium range comparisons of capacitive pressure sensors with wide pressure sensing range.

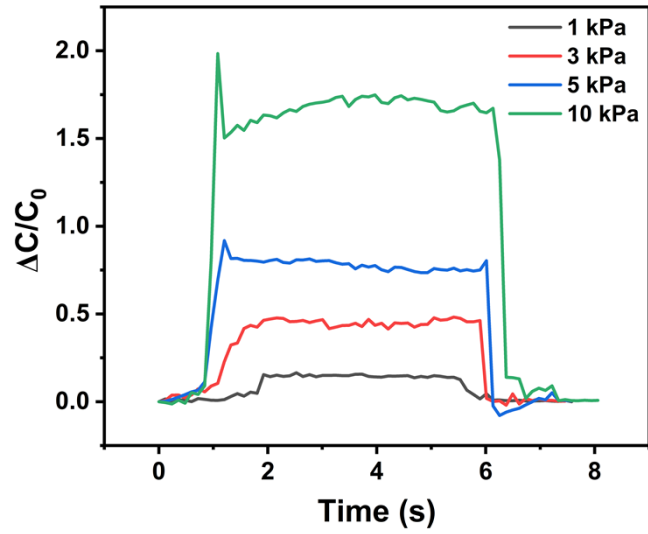

**Fig. S3.** Capacitance change of the pressure sensor at small static pressures (1 kPa, 3 kPa, 5 kPa and 10 kPa).

**Table S1.** Comparison of Capacitive Pressure Sensors with Wide Pressure Sensing Range

| Pressure sensing mechanism | Sensitivity at the low pressure range (<10 kPa) (kPa <sup>-1</sup> ) | Sensitivity at the medium pressure range (10–100 kPa) (kPa <sup>-1</sup> ) | Sensitivity ratio (medium /low pressure) | Ref. |
|----------------------------|----------------------------------------------------------------------|----------------------------------------------------------------------------|------------------------------------------|------|
| Parallel plate capacitance | 0.16 (0–10 kPa)                                                      | 0.004 (50–200 kPa)                                                         | 0.025                                    | [1]  |
| Parallel plate capacitance | 0.1261 (0–2.5 kPa)                                                   | 0.0143 (25–60 kPa)                                                         | 0.113                                    | [2]  |
| Parallel plate capacitance | 1.47 (0.1–10 kPa)                                                    | 0.6 (10–100 kPa)                                                           | 0.408                                    | [3]  |
| Parallel plate capacitance | 1.25 (0–98 kPa)                                                      |                                                                            | ≈1                                       | [4]  |
| EDLs capacitance           | 9280 (2–20 kPa)                                                      | 1811.4 (20–60 kPa)                                                         | 0.195                                    | [5]  |

|                                     |                      |                      |       |                                 |
|-------------------------------------|----------------------|----------------------|-------|---------------------------------|
| EDLs capacitance                    | 3302.9 (<10 kPa)     | 671.7 (10–100 kPa)   | 0.203 | [6]                             |
| EDLs capacitance                    | 10402.8 (0–12.5 kPa) | 4536.2 (12.5–80 kPa) | 0.436 | [7]                             |
| EDLs capacitance                    | 171 (0–60 kPa)       | 12 (60–250 kPa)      | 0.07  | [8]                             |
| EDLs capacitance                    | 3224.2 (0–100 kPa)   |                      | ≈1    | [9]                             |
| EDLs capacitance                    | 83.9 (0–20 kPa)      | 20.4 (20–100 kPa)    | 0.243 | [10]                            |
| EDLs-pseudo capacitance             | 216.4 (0–60 kPa)     | 5032.9 (60–200 kPa)  | 23.25 | [11]                            |
| Parallel plate and EDLs capacitance | 0.16 (0–20 kPa)      | 14.25 (20–50 kPa)    | 89.06 | This work (weight ration = 8:1) |

#### Reference:

- [1] Zhou Q, Ji B, Wei Y, et al. A bio-inspired cilia array as the dielectric layer for flexible capacitive pressure sensors with high sensitivity and a broad detection range. *Journal of Materials Chemistry A*, 2019, 7(48): 27334-27346.
- [2] Kim D H, Jung Y, Jung K, et al. Hollow polydimethylsiloxane (PDMS) foam with a 3D interconnected network for highly sensitive capacitive pressure sensors. *Micro and Nano Systems Letters*, 2020, 8: 1-7.
- [3] Li T, Duan Z, Huang Q, et al. Integrated surface microstructure and enhanced dielectric constant for constructing simple, low-cost, and high-performance flexible capacitive pressure sensor. *Sensors and Actuators A: Physical*, 2024: 115629.
- [4] Qin R, Hu M, Li X, et al. A new strategy for the fabrication of a flexible and highly sensitive capacitive pressure sensor. *Microsystems & Nanoengineering*, 2021, 7(1): 100.
- [5] Liu Q, Liu Y, Shi J, et al. High-porosity foam-based iontronic pressure sensor with superhigh sensitivity of 9280 kPa<sup>-1</sup>. *Nano-Micro Letters*, 2022, 14: 1-12.
- [6] Bai N, Wang L, Wang Q, et al. Graded intrafillable architecture-based iontronic pressure sensor with ultra-broad-range high sensitivity. *Nature communications*, 2020, 11(1): 209.
- [7] Ding Z, Li W, Wang W, et al. Highly Sensitive Iontronic Pressure Sensor with Side-by-Side Package Based on Alveoli and Arch Structure. *Advanced Science*, 2024: 2309407.
- [8] Guo Y, Yin F, Li Y, et al. Incorporating wireless strategies to wearable devices enabled by a photocurable hydrogel for monitoring pressure information. *Advanced Materials*, 2023, 35(29): 2300855.
- [9] Li J, Li J, Tang Y, et al. Touchable gustation via a hoffmeister gel iontronic sensor. *ACS Nano*,

2023, 17(5): 5129-5139.

- [10] Tang J, Zhao C, Luo Q, et al. Ultrahigh-transparency and pressure-sensitive iontronic device for tactile intelligence. *npj Flexible Electronics*, 2022, 6(1): 54.
- [11] Gao L, Wang M, Wang W, et al. Highly sensitive pseudocapacitive iontronic pressure sensor with broad sensing range. *Nano-Micro Letters*, 2021, 13: 1-14.
